# Supplementary material
Source: publisher site journal article supplement (https://www.dovepress.com/article/439404)
Supplement: Supplementary file 1 [file get_supplementary_file.php]

Appendix 1

Questionnaire

| **I-deals**  1. I have obtained a job that suits my personal advantages and talents.  2. My work tasks match my personal interests.  3. My personal rewards are conducive to motivating my work.  4. My job is suitable for my personal goal and career choice.  5. I successfully negotiated with my superiors and got a special opportunity to learn skills.  6. My leader ensures that my career development is approached in the right way.  7. My job fits my personal schedule.  8. I am very flexible at the beginning and end of the day's work.  9. My leader customises my work schedule to suit my personal needs.  10. I have been given work assignments tailored to my needs by my leader.  11. I am proactive in negotiating personalised work with my leader.  12. Part of my work is non-standardised.  **Psychological safety**   1. In my work unit, I can express my true feelings about work.   14. In my work unit, I can freely express my thoughts.  15. In my work unit, expressing your true feelings is welcomed.  16. Nobody in my unit will pick on me even if I have different opinions.  17. I’m worried that expressing true thoughts in my workplace would do harm to myself (R).  **Perceived insider status**   1. I can feel strongly that I am a member of the company. 2. My work organization makes me believe that I am included in it. 3. I feel like I am an ‘outsider’ at this organization. (R) 4. I don’t feel included in this organization. (R) 5. I feel I am an ‘insider’ in my work organization. 6. My work organization makes me frequently feel ‘left-out’. (R)   **Creativity**  24.Tries new ideas or methods first.  25. In daily work, the employee will often exchange some new work-related ideas with his superiors and try to put them into practice.  26. Generates ground-breaking ideas related to the field.  27. Is a good role model for creativity. |
| --- |
